# Supplementary material for: CXCL8 is essential for cervical cancer cell acquired radioresistance and acts as a promising therapeutic target in cervical cancer
Source: Sci Rep. 2025 Jul 1;15:20467. doi: 10.1038/s41598-025-05435-w (PMC12219856; doi:10.1038/s41598-025-05435-w)
Supplement: Supplementary file 1 — Supplementary Material 1 [file 41598_2025_5435_MOESM1_ESM.xlsx]

## Sheet: Sheet1
Table 1 The real-time PCR primer sequences
GENE	引物序列
TNFAIP6 Forward	5′-GGAAGAUUUAGCCACUUAUTT-3′
TNFAIP6 Reverse	5′-AUAAGUGGCUAAAUCUUCCTT-3′
CXCL8 Forward	5′-GUAAAGCUUUCUGAUGGAATT-3′
CXCL8 Reverse	5′-UUCCAUCAGAAAGCUUUACTT-3′
HSPA8 Forward	5′-GUGCCCGAUUUGAAGAACUTT-3′
HSPA8 Reverse	5′-AGUUCUUCAAAUCGGGCACTT-3′
IGFBP6 Forward	5′-GUAGACAUCUGGACUCAGUTT-3′
IGFBP6 Reverse	5′-ACUGAGUCCAGAUGUCUACTT-3′
GAPDH Forward	5′-UUCUCCGAACGUGUCACGUTT-3′
GAPDH Reverse	5′-ACGUGACACGUUCGGAGAATT-3′
