# Supplementary material for: CXCL8 is essential for cervical cancer cell acquired radioresistance and acts as a promising therapeutic target in cervical cancer
Source: Sci Rep. 2025 Jul 1;15:20467. doi: 10.1038/s41598-025-05435-w (PMC12219856; doi:10.1038/s41598-025-05435-w)
Supplement: Supplementary file 2 — Supplementary Material 2 [file 41598_2025_5435_MOESM2_ESM.xlsx]

## Sheet: Sheet1
Table 2 Sequences of CXCL8 siRNAs
目录号	Gene	sequences		OD
		sense（5'-3'）	antisense（5'-3'）
A10001	CXCL8-Homo-367	GAAGAGGGCUGAGAAUUCATT	UGAAUUCUCAGCCCUCUUCTT	2
A10001	CXCL8-Homo-290	GUAAAGCUUUCUGAUGGAATT	UUCCAUCAGAAAGCUUUACTT	2
A10001	CXCL8-Homo-216	ACCUUUCCACCCCAAAUUUTT	AAAUUUGGGGUGGAAAGGUTT	2
A10001	CXCL8-Homo-92	UGACUUCCAAGCUGGCCGUTT	ACGGCCAGCUUGGAAGUCATT	2
G04008	GP-transfect-Mate			400ul
