# Supplementary material for: CXCL8 is essential for cervical cancer cell acquired radioresistance and acts as a promising therapeutic target in cervical cancer
Source: Sci Rep. 2025 Jul 1;15:20467. doi: 10.1038/s41598-025-05435-w (PMC12219856; doi:10.1038/s41598-025-05435-w)
Supplement: Supplementary file 4 — Supplementary Material 4 [file 41598_2025_5435_MOESM4_ESM.xlsx]

## Sheet: Sheet1
Table 3 Test sample quality control of mRNA-seq
序号	样本名称	浓度(ng/μL)	体积 (μL)	总量(μg)	A260/ A280	A260/ A230	电泳		质检结论		备注及建议
							RIN	28S/	电泳	总量
								18S
1	H0_1	326	45	14.67	2.02	2.17	/	/	B2	A	Acceptable
2	H0_2	293	45	13.19	1.94	1.64	/	/	B2	A	Acceptable
3	H0_3	309	45	13.91	2.03	2.22	/	/	B2	A	Acceptable
4	HR_1	291	45	13.1	2.04	2.27	/	/	B2	A	Acceptable
5	HR_2	319	45	14.36	1.98	1.88	/	/	B2	A	Acceptable
6	HR_3	344	45	15.48	2.04	2.32	/	/	B2	A	Acceptable
7	S0_1	380	45	17.1	2.02	2.28	/	/	B2	A	Acceptable
8	S0_2	590	45	26.55	2.02	2.2	/	/	B2	A	Acceptable
9	S0_3	321	45	14.45	2.02	2.25	/	/	B2	A	Acceptable
10	SR_1	247	45	11.12	1.95	1.78	/	/	B2	A	Acceptable
11	SR_2	232	45	10.44	1.99	1.7	/	/	B2	A	Acceptable
12	SR_3	269	45	12.11	2.04	2.35	/	/	B2	A	Acceptable
附电泳图
备注
