# Supplementary material for: CXCL8 is essential for cervical cancer cell acquired radioresistance and acts as a promising therapeutic target in cervical cancer
Source: Sci Rep. 2025 Jul 1;15:20467. doi: 10.1038/s41598-025-05435-w (PMC12219856; doi:10.1038/s41598-025-05435-w)
Supplement: Supplementary file 6 — Supplementary Material 6 [file 41598_2025_5435_MOESM6_ESM.xlsx]

## Sheet: Sheet1
Table 5 The top 10 most significant differential genes analyzed by Venn diagram plots
